# Supplementary material
Source: publisher figshare collection journal article supplement (https://tandf.figshare.com/ndownloader/files/12284600)
Supplement: Supplementary file 1 [file 12284600]

Supplemental Figures

Supplemental Figure 1. Growth of tomato seedlings with *A. graecizans* (No. 2)*.* Treatment 1 = Above ground material mixed with soil, Treatment 2 = Control, no *Amaranthus* were planted in this pot, Treatment 3 = Underground material mixed with soil, Treatment 4 = *Amaranthus* removed, but no material mixed with soil and Treatment 5 = No material mixed with soil, but plant material was used to make an extract which was used as a treatment. No statistical differences were observed.

Supplemental Figure 2. Growth of tomato (cv. Rodade) plants during the first season with the following spacing; S0 = no *Amaranthus*, S1 = *Amaranthus* grown at 25cm x 20cm spacing (20 plants m-2) and S2 = *Amaranthus* grown at 50cm x 20cm spacing (10 plants m-2). No statistical differences were observed.

Supplemental Figure 3. Growth of tomato plants during the second season with the following spacings; S0 = no *Amaranthus*, S1 = *Amaranthus* grown at 25cm x 20cm spacing (20 plants m-2) and S2 = *Amaranthus* grown at 50cm x 20cm spacing (10 plants m-2) and the following cultivars; C1 = Rodade and C2 = Star 9006. No statistical differences were observed.

Supplemental Figure 4. Growth of cabbage (cv. Conquestador) during the first season with the following spacings; S0 = no *Amaranthus*, S1 = *Amaranthus* grown at 25cm x 20cm spacing (20 plants m-2) and S2 = *Amaranthus* grown at 50cm x 20cm spacing (10 plants m-2). No statistical differences were observed.

Supplemental Figure 5. Growth of cabbage during the second season with the following spacings; S0 = no *Amaranthus*, S1 = *Amaranthus* grown at 25cm x 20cm spacing (20 plants m-2) and S2 = *Amaranthus* grown at 50cm x 20cm spacing (10 plants m-2) and the following cultivars; C1 = Conquestador and C2 = Tenacity. No statistical differences were observed.
